# Supplementary material for: Targeting Menin disrupts the KMT2A/B and polycomb balance to paradoxically activate bivalent genes
Source: PubMed Central journal article supplement (PMC7614190; doi:10.1038/s41556-022-01056-x), 2023-01-12

# Source Data: Western blot gels

## Western blot images. Extended Data Figure 6

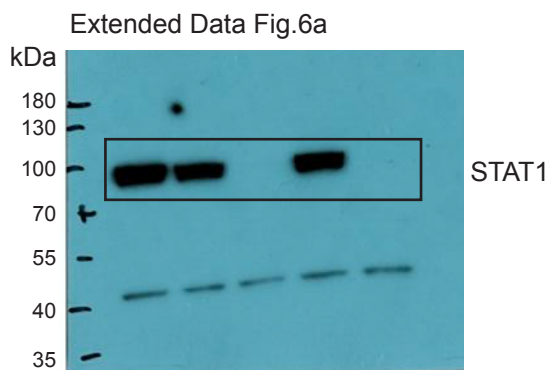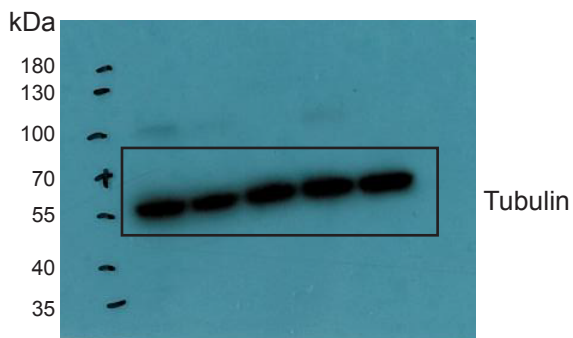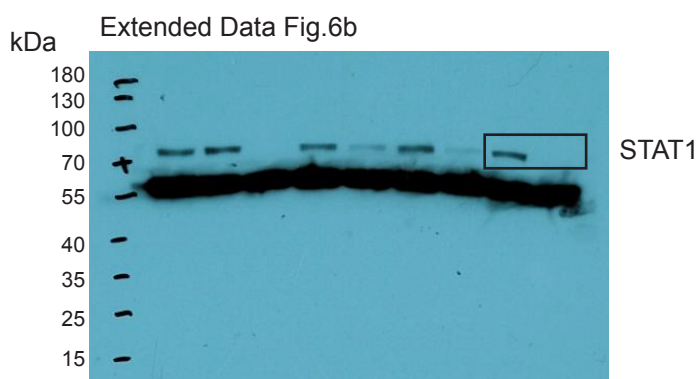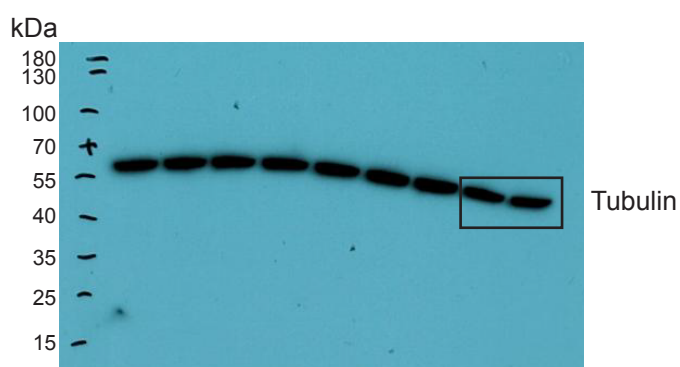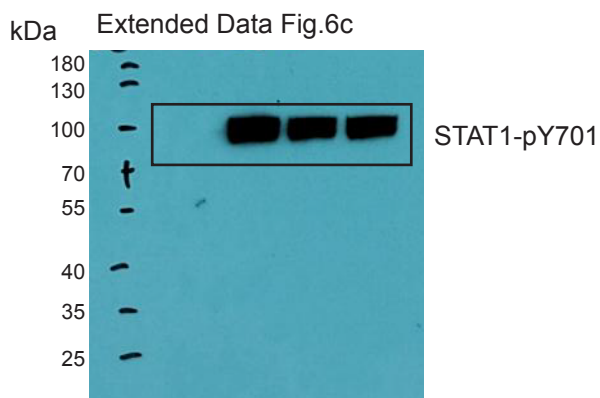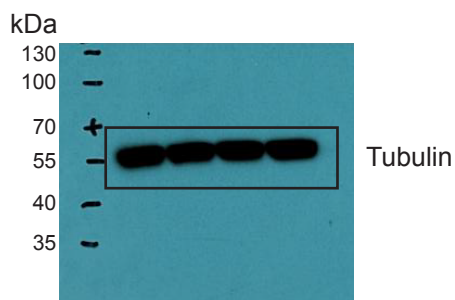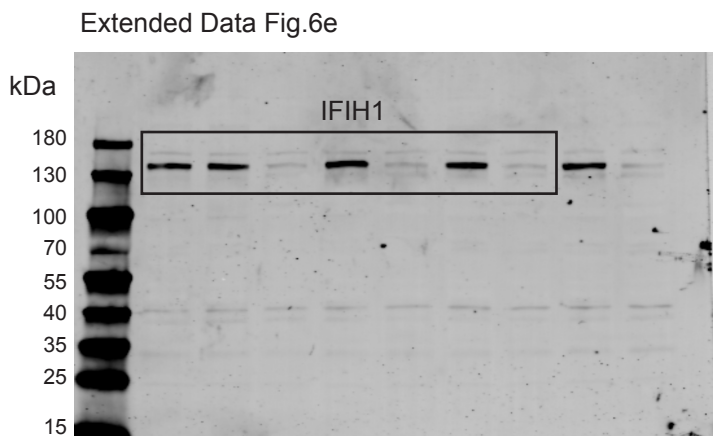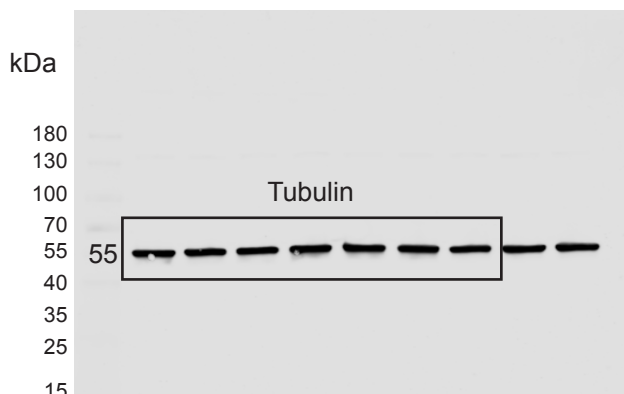

Western blot images. Extended Data Figure 6

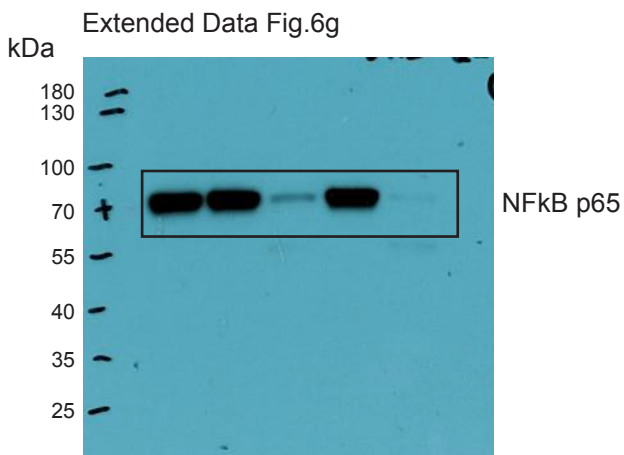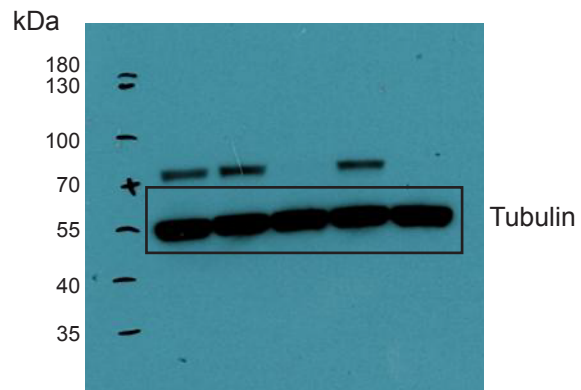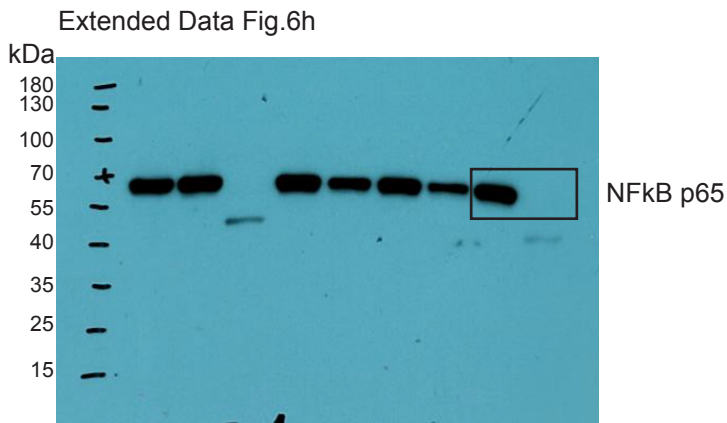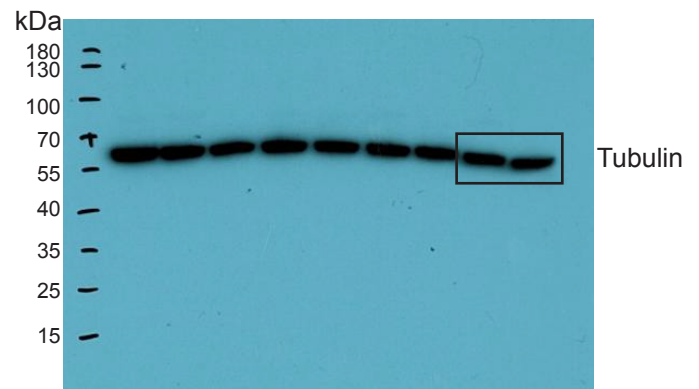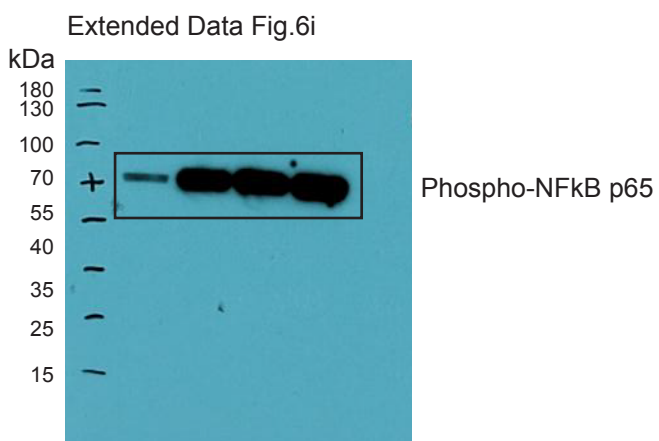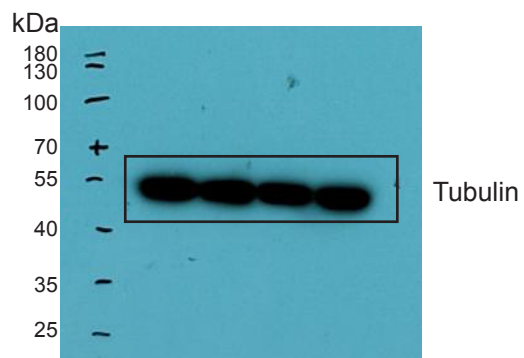

Supplement: EMS157168-supplement-Source_Data_Extended_Data_Fig__6.pdf [file EMS157168-supplement-Source_Data_Extended_Data_Fig__6.pdf]
