# Supplementary material for: Targeting Menin disrupts the KMT2A/B and polycomb balance to paradoxically activate bivalent genes
Source: PubMed Central journal article supplement (PMC7614190; doi:10.1038/s41556-022-01056-x), 2023-01-12
Supplement: EMS157168-supplement-Supplementary_Figures_1_3_.pdf [file EMS157168-supplement-Supplementary_Figures_1_3_.pdf]

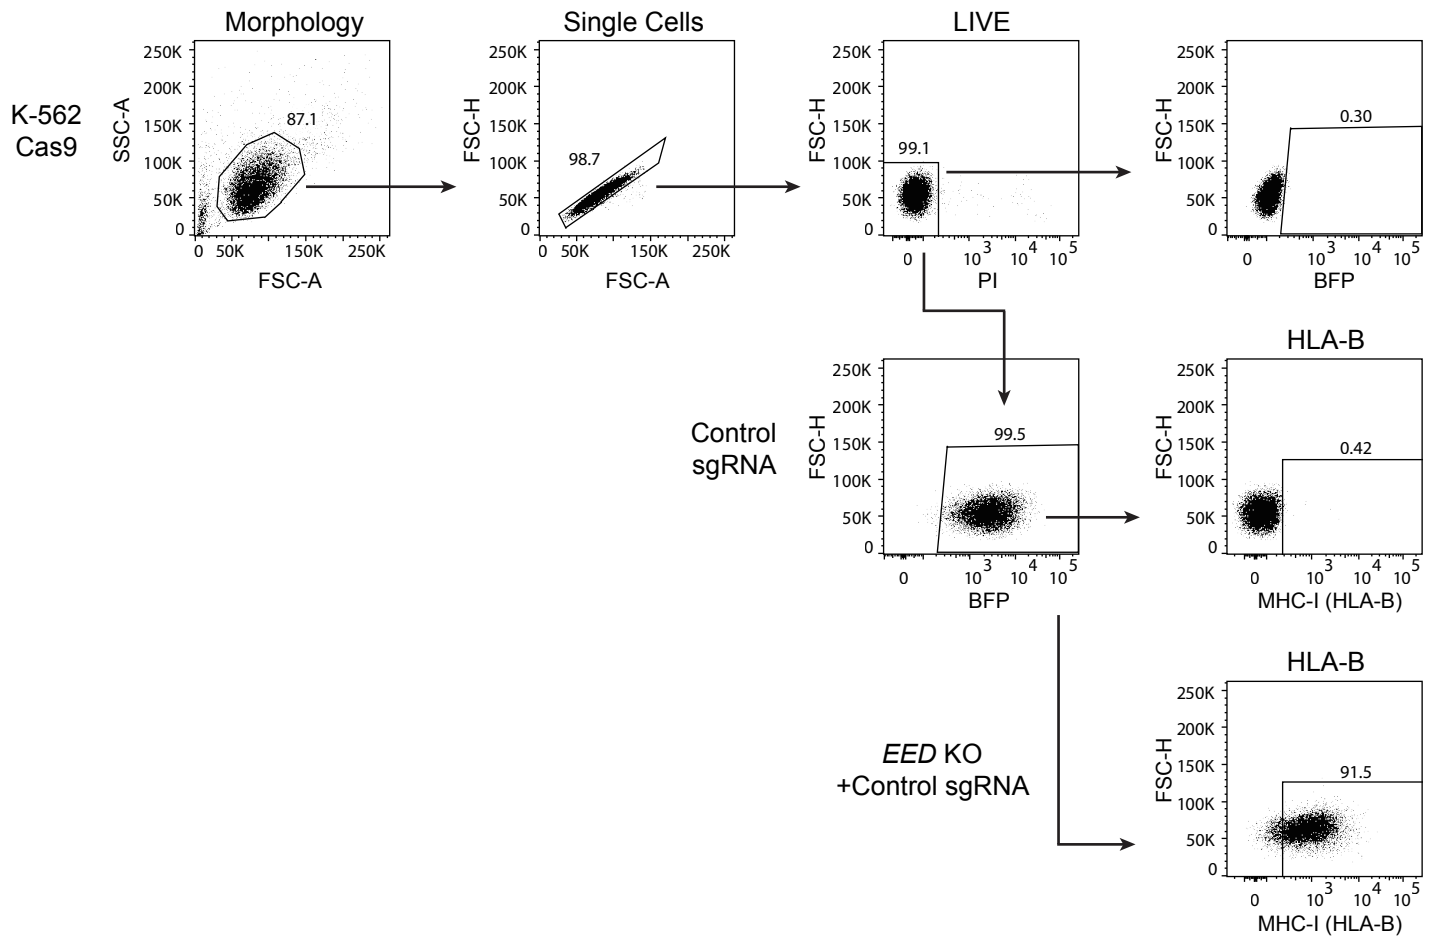

**Supplementary Figure 1:** Representative gating strategy of flow cytometry in K-562 Cas9 (top), K-562 Cas9 control sgRNA expressing (middle) and K-562 Cas9 *EED* KO control sgRNA expressing (bottom) cells, to assess cell surface MHC-I expression.

**Related to Main Figure 2:**

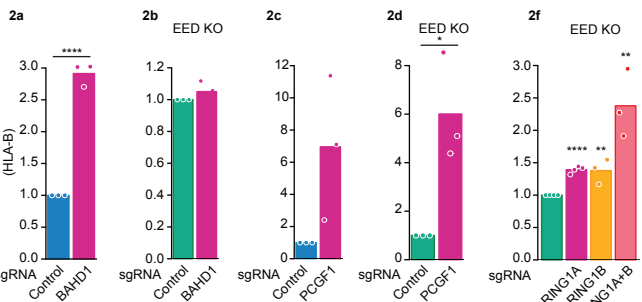

**Related to Main Figure 3:**

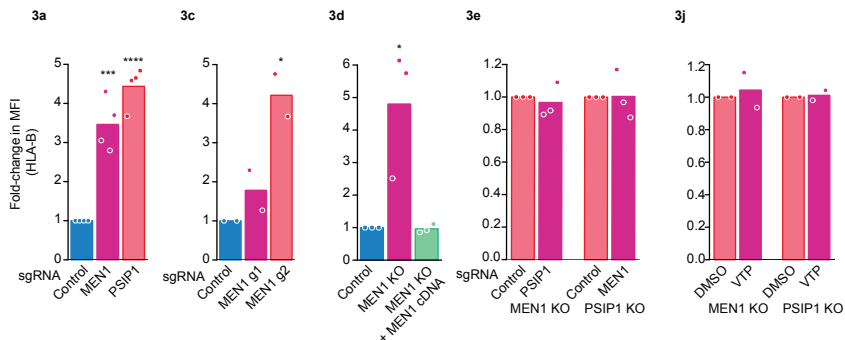

**Related to Main Figure 4:**

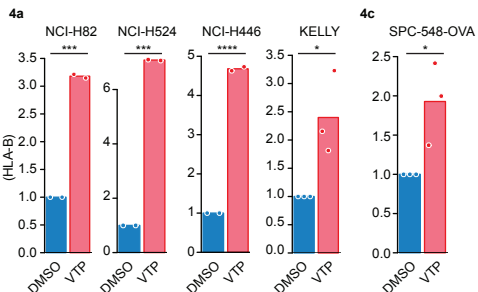

**Related to Main Figure 5:**

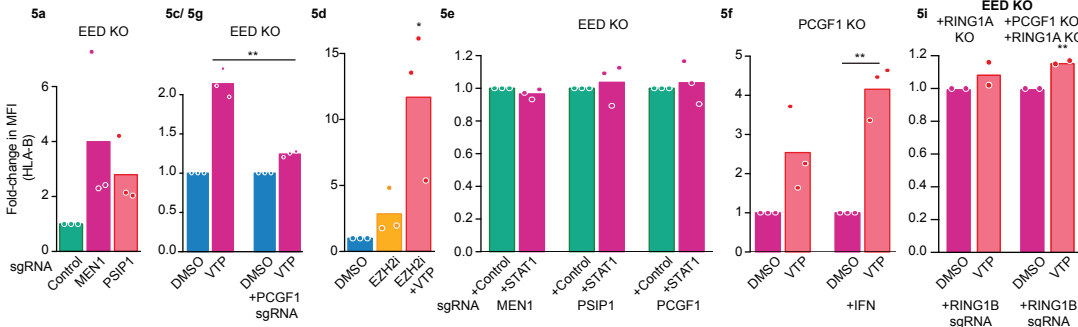

**Related to Main Figure 7:**

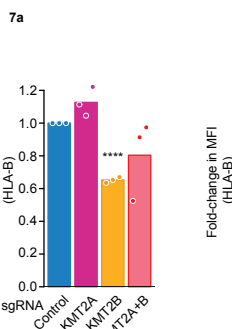

**Related to Main Figure 8:**

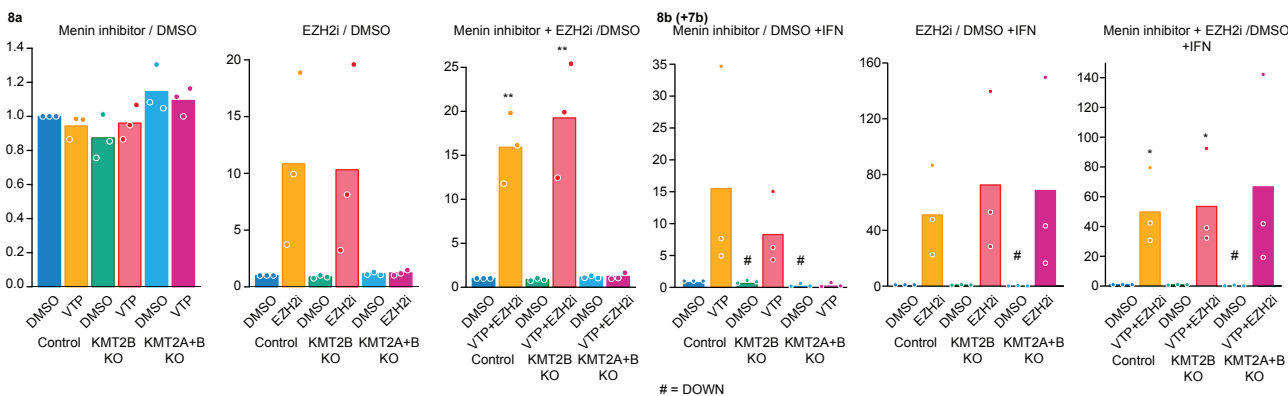

**Related to Main Figure 8:**

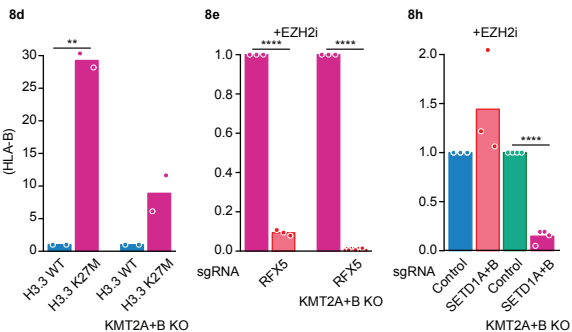

**Supplementary Figure 2: Related to Main Figures.**

Bar graphs depicting cell surface MHC-I as mean fold change in MFI from the indicated Main and Extended Data Figures. Points indicate independent replicates. Unpaired two-tailed t-test, significance is defined as p-value \* $<0.05$ , \*\* $<0.01$ , \*\*\* $<0.001$ , \*\*\*\* $<0.0001$ , non-significant data were not annotated.

**Related to Extended Data Figure 1:**

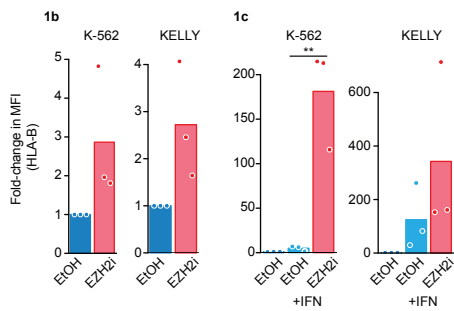

**Related to Extended Data Figure 2:**

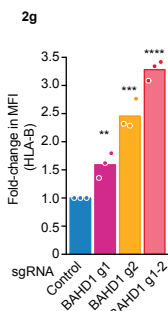

**Related to Extended Data Figure 3:**

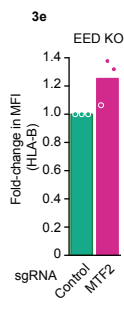

**Related to Extended Data Figure 4:**

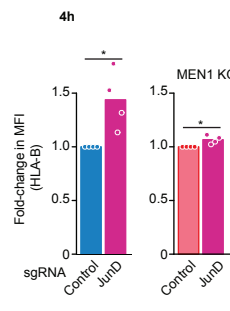

**Related to Extended Data Figure 5:**

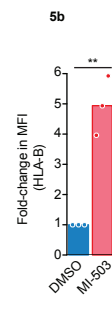

**Related to Extended Data Figure 5:**

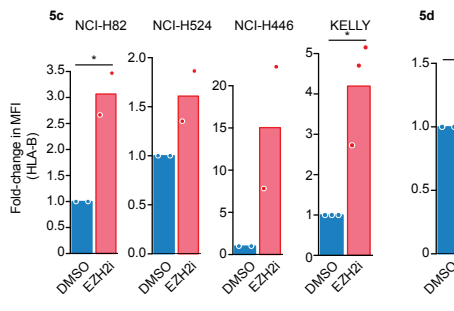

**Related to Extended Data Figure 5:**

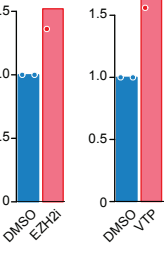

**Related to Extended Data Figure 5:**

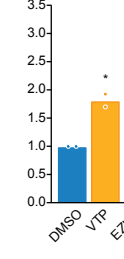

**Related to Extended Data Figure 6:**

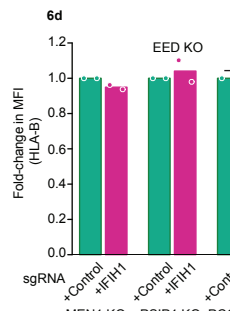

**Related to Extended Data Figure 6:**

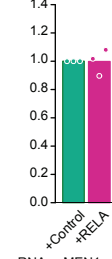

**Related to Extended Data Figure 6:**

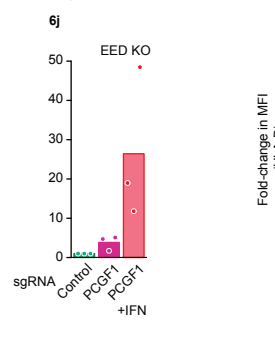

**Related to Extended Data Figure 9:**

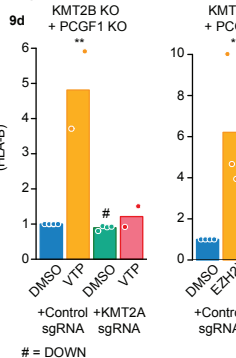

**Related to Extended Data Figure 9:**

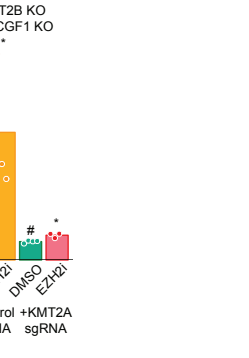

**Supplementary Figure 3: Related to Extended Data Figures.**

Bar graphs depicting cell surface MHC-I as mean fold change in MFI from the indicated Main and Extended Data Figures. Points indicate independent replicates. Unpaired two-tailed t-test, significance is defined as p-value \* $<0.05$ , \*\* $<0.01$ , \*\*\* $<0.001$ , \*\*\*\* $<0.0001$ , non-significant data were not annotated.
